# Supplementary material
Source: PubMed Central journal article supplement (PMC2782894)

## Supplemental Data

### Cytotoxic Metabolites from an Indonesian Sponge *Lendenfeldia* sp.

Jingqiu Dai,<sup>†</sup> Yang Liu,<sup>†</sup> Yu-Dong Zhou,<sup>\*</sup> and Dale G. Nagle<sup>\*</sup>

*Department of Pharmacognosy and Research Institute of Pharmaceutical Sciences, School of Pharmacy, University of Mississippi, University, MS 38677-1848*

\*Joint Corresponding Authors to whom correspondence should be addressed:

Y.-D. Z.: Tel.: (662) 915-7026. Fax.: (662) 915-6975. E-mail: ydzhou@olemiss.edu.

D. G. N.: Tel.: (662) 915-7026. Fax.: (662) 915-6975. E-mail: dnagle@olemiss.edu.

### Table of Contents

**Table S1.** IC<sub>50</sub> Values (μM) of **1**, **3**, **4**, and **5** on HIF-1 Activation and Cell Proliferation/Viability in T47D Breast Tumor Cells.

**Table S2.** IC<sub>50</sub> Values (μM) of **1**, **3**, **4**, and **5** on Cell Proliferation/Viability in T47D and MDA-MB-231 Breast Tumor Cells (48 h, Neutral Red Method).

**Figure S3.** NCI/DTP 60-cell GI<sub>50</sub>, TGI, and LC<sub>50</sub> Mean Bar Graphs for Compound **3**.

**Figure S4.** NCI/DTP 60-cell GI<sub>50</sub>, TGI, and LC<sub>50</sub> Mean Bar Graphs for Compound **4**.

**Figure S5.** NCI/DTP 60-cell GI<sub>50</sub>, TGI, and LC<sub>50</sub> Mean Bar Graphs for Compound **5**.

**Figure S6.** NCI/DTP 60-cell GI<sub>50</sub>, TGI, and LC<sub>50</sub> Mean Bar Graphs for Compound **6**.

**Figure S7.** NCI/DTP 60-cell GI<sub>50</sub>, TGI, and LC<sub>50</sub> Mean Bar Graphs for Compound **7**.

**Table S1.** IC<sub>50</sub> Values (μM) of **1**, **3**, **4**, and **5** on HIF-1 Activation and Cell Proliferation/Viability in T47D Breast Tumor Cells.

| compd    | hypoxia-induced<br>HIF-1 inhibition<br>(pHRE-TK-Luc) | iron chelator-induced<br>HIF-1 inhibition<br>(pHRE-TK-Luc) | cell viability<br>(hypoxia, 16 h) |
|----------|------------------------------------------------------|------------------------------------------------------------|-----------------------------------|
| <b>1</b> | 4.3                                                  | 5.1                                                        | 19                                |
| <b>3</b> | 6.9                                                  | 4.5                                                        | 8.4                               |
| <b>4</b> | 0.64                                                 | 0.5                                                        | 3.3                               |
| <b>5</b> | 3.5                                                  | 2.4                                                        | 6.7                               |

**Table S2.** IC<sub>50</sub> Values (μM) of **1**, **3**, **4**, and **5** on Cell Proliferation/Viability in T47D and MDA-MB-231 Breast Tumor Cells (48 h, Neutral Red Method).

| compd    | T47D<br>(hypoxia) | T47D<br>(normoxia) | MDA-MB-231<br>(hypoxia) | MDA-MB-231<br>(normoxia) |
|----------|-------------------|--------------------|-------------------------|--------------------------|
| <b>1</b> | 8.3               | 8.7                | 7.0                     | 6.0                      |
| <b>3</b> | 7.2               | 6.8                | 8.3                     | 8.5                      |
| <b>4</b> | 1.9               | 1.4                | 1.5                     | 1.4                      |
| <b>5</b> | 5.3               | 4.7                | 5.4                     | 4.9                      |

Mean Graphs

**S3. Compound 3**

Report Date : May 12, 2007

Test Date : June 19, 2006

| Panel/Cell Line            | Log <sub>10</sub> GI50 | GI50 | Log <sub>10</sub> TGI | TGI | Log <sub>10</sub> LC50 | LC50 |
|----------------------------|------------------------|------|-----------------------|-----|------------------------|------|
| <hr/>                      |                        |      |                       |     |                        |      |
| Leukemia                   |                        |      |                       |     |                        |      |
| HL-60(TB)                  | -4.77                  |      | -4.38                 |     | > -4.00                |      |
| K-562                      | -4.56                  |      | -4.11                 |     | > -4.00                |      |
| MOLT-4                     | -4.86                  |      | -4.43                 |     | > -4.00                |      |
| RPMI-8226                  | -4.76                  |      | -4.30                 |     | > -4.00                |      |
| SR                         | -4.80                  |      | -4.39                 |     | > -4.00                |      |
| Non-Small Cell Lung Cancer |                        |      |                       |     |                        |      |
| A549/ATCC                  | -4.55                  |      | > -4.00               |     | > -4.00                |      |
| EKVX                       | -4.59                  |      | > -4.00               |     | > -4.00                |      |
| HOP-62                     | -4.79                  |      | -4.51                 |     | > -4.24                |      |
| HOP-92                     | -4.76                  |      | -4.34                 |     | > -4.00                |      |
| NCI-H226                   | -4.63                  |      | -4.15                 |     | > -4.00                |      |
| NCI-H23                    | -4.67                  |      | -4.14                 |     | > -4.00                |      |
| NCI-H322M                  | -4.35                  |      | > -4.00               |     | > -4.00                |      |
| NCI-H460                   | -4.76                  |      | -4.43                 |     | -4.10                  |      |
| NCI-H522                   | -4.75                  |      | -4.38                 |     | -4.01                  |      |
| Colon Cancer               |                        |      |                       |     |                        |      |
| COLO 205                   | -4.75                  |      | -4.42                 |     | -4.09                  |      |
| HCC-2998                   | -4.67                  |      | -4.33                 |     | > -4.00                |      |
| HCT-116                    | -4.82                  |      | -4.55                 |     | -4.27                  |      |
| HCT-15                     | -4.75                  |      | -4.48                 |     | -4.22                  |      |
| HT29                       | -4.68                  |      | -4.28                 |     | > -4.00                |      |
| KM12                       | -4.45                  |      | > -4.00               |     | > -4.00                |      |
| SW-620                     | -4.78                  |      | -4.49                 |     | -4.20                  |      |
| CNS Cancer                 |                        |      |                       |     |                        |      |
| SF-268                     | -4.59                  |      | -4.17                 |     | > -4.00                |      |
| SF-295                     | -4.68                  |      | -4.23                 |     | > -4.00                |      |
| SF-539                     | -4.76                  |      | -4.47                 |     | -4.19                  |      |
| SNB-19                     | -4.49                  |      | > -4.00               |     | > -4.00                |      |
| SNB-75                     | -4.68                  |      | -4.35                 |     | -4.01                  |      |
| U251                       | -4.73                  |      | -4.43                 |     | -4.13                  |      |
| Melanoma                   |                        |      |                       |     |                        |      |
| LOX IMVI                   | -4.76                  |      | -4.51                 |     | -4.25                  |      |
| MALME-3M                   | -4.64                  |      | -4.34                 |     | -4.04                  |      |
| M14                        | -4.71                  |      | -4.43                 |     | -4.14                  |      |
| SK-MEL-2                   | -4.59                  |      | -4.22                 |     | > -4.00                |      |
| SK-MEL-28                  | -4.74                  |      | -4.49                 |     | -4.23                  |      |
| SK-MEL-5                   | -4.87                  |      | -4.57                 |     | -4.27                  |      |
| UACC-257                   | -4.57                  |      | -4.07                 |     | > -4.00                |      |
| UACC-62                    | -4.87                  |      | -4.55                 |     | -4.22                  |      |
| Ovarian Cancer             |                        |      |                       |     |                        |      |
| IGROV1                     | -4.48                  |      | > -4.00               |     | > -4.00                |      |
| OVCAR-3                    | -4.81                  |      | -4.51                 |     | -4.20                  |      |
| OVCAR-4                    | -4.74                  |      | -4.13                 |     | > -4.00                |      |
| OVCAR-5                    | -4.61                  |      | -4.28                 |     | > -4.00                |      |
| OVCAR-8                    | -4.62                  |      | -4.16                 |     | > -4.00                |      |
| SK-OV-3                    | -4.45                  |      | > -4.00               |     | > -4.00                |      |
| Renal Cancer               |                        |      |                       |     |                        |      |
| 786-0                      | -4.74                  |      | -4.44                 |     | -4.15                  |      |
| A498                       | -4.61                  |      | -4.10                 |     | > -4.00                |      |
| ACHN                       | -4.73                  |      | -4.47                 |     | -4.21                  |      |
| RXF 393                    | -4.83                  |      | -4.53                 |     | -4.23                  |      |
| SN12C                      | -4.83                  |      | -4.39                 |     | > -4.00                |      |
| TK-10                      | -4.53                  |      | -4.15                 |     | > -4.00                |      |
| UO-31                      | -4.77                  |      | -4.46                 |     | -4.14                  |      |
| Prostate Cancer            |                        |      |                       |     |                        |      |
| PC-3                       | -4.71                  |      | -4.16                 |     | > -4.00                |      |
| DU-145                     | -4.72                  |      | -4.35                 |     | > -4.00                |      |
| Breast Cancer              |                        |      |                       |     |                        |      |
| MCF7                       | -4.62                  |      | -4.14                 |     | > -4.00                |      |
| NCI/ADR-RES                | -4.62                  |      | -4.24                 |     | > -4.00                |      |
| MDA-MB-231/ATCC            | -4.77                  |      | -4.47                 |     | -4.16                  |      |
| HS 578T                    | -4.72                  |      | -4.27                 |     | > -4.00                |      |
| MDA-MB-435                 | -4.70                  |      | -4.33                 |     | > -4.00                |      |
| BT-549                     | -4.72                  |      | -4.42                 |     | -4.11                  |      |
| T-47D                      | -4.75                  |      | -4.05                 |     | > -4.00                |      |

MID  
Delta  
Range

-4.69  
0.18  
0.52

-4.3  
0.27  
0.57

-4.07  
0.2  
0.27

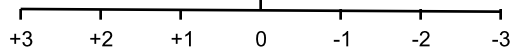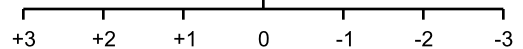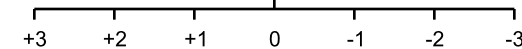

Mean Graphs

**S4. Compound 4**

Report Date : May 12, 2007

Test Date : June 19, 2006

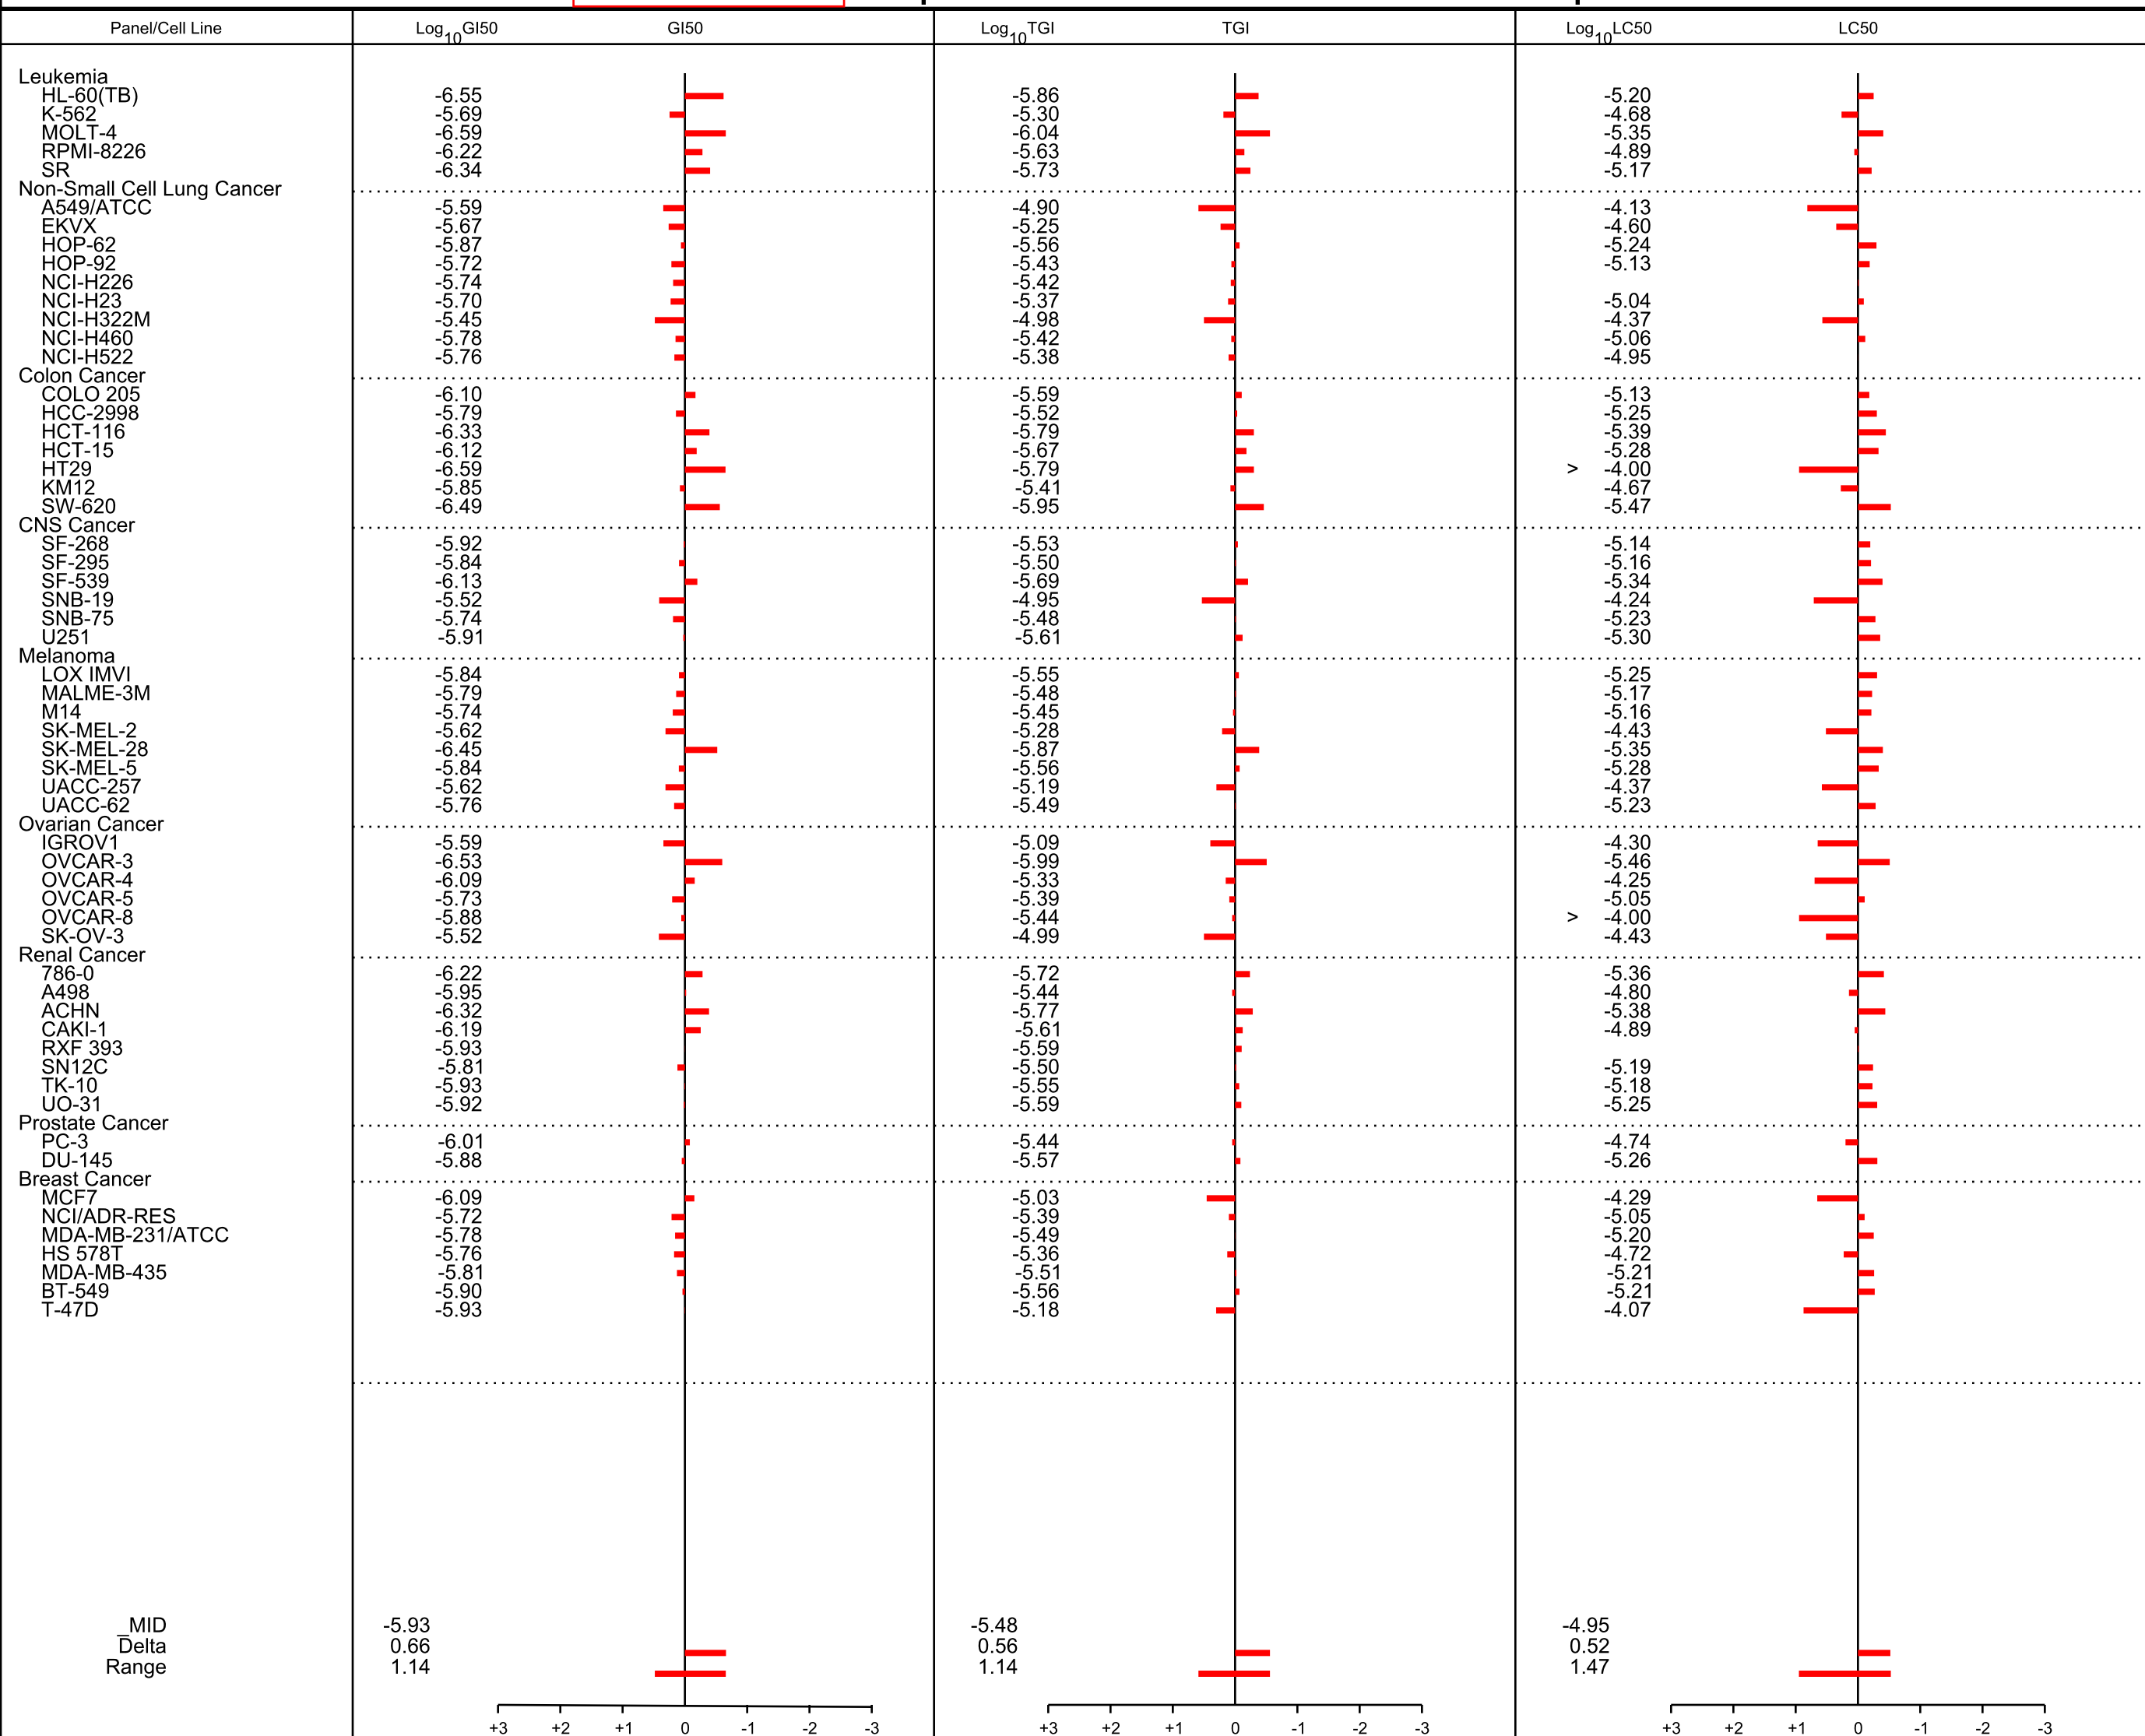

Mean Graphs

**S5. Compound 5**

Report Date : May 12, 2007

Test Date : June 19, 2006

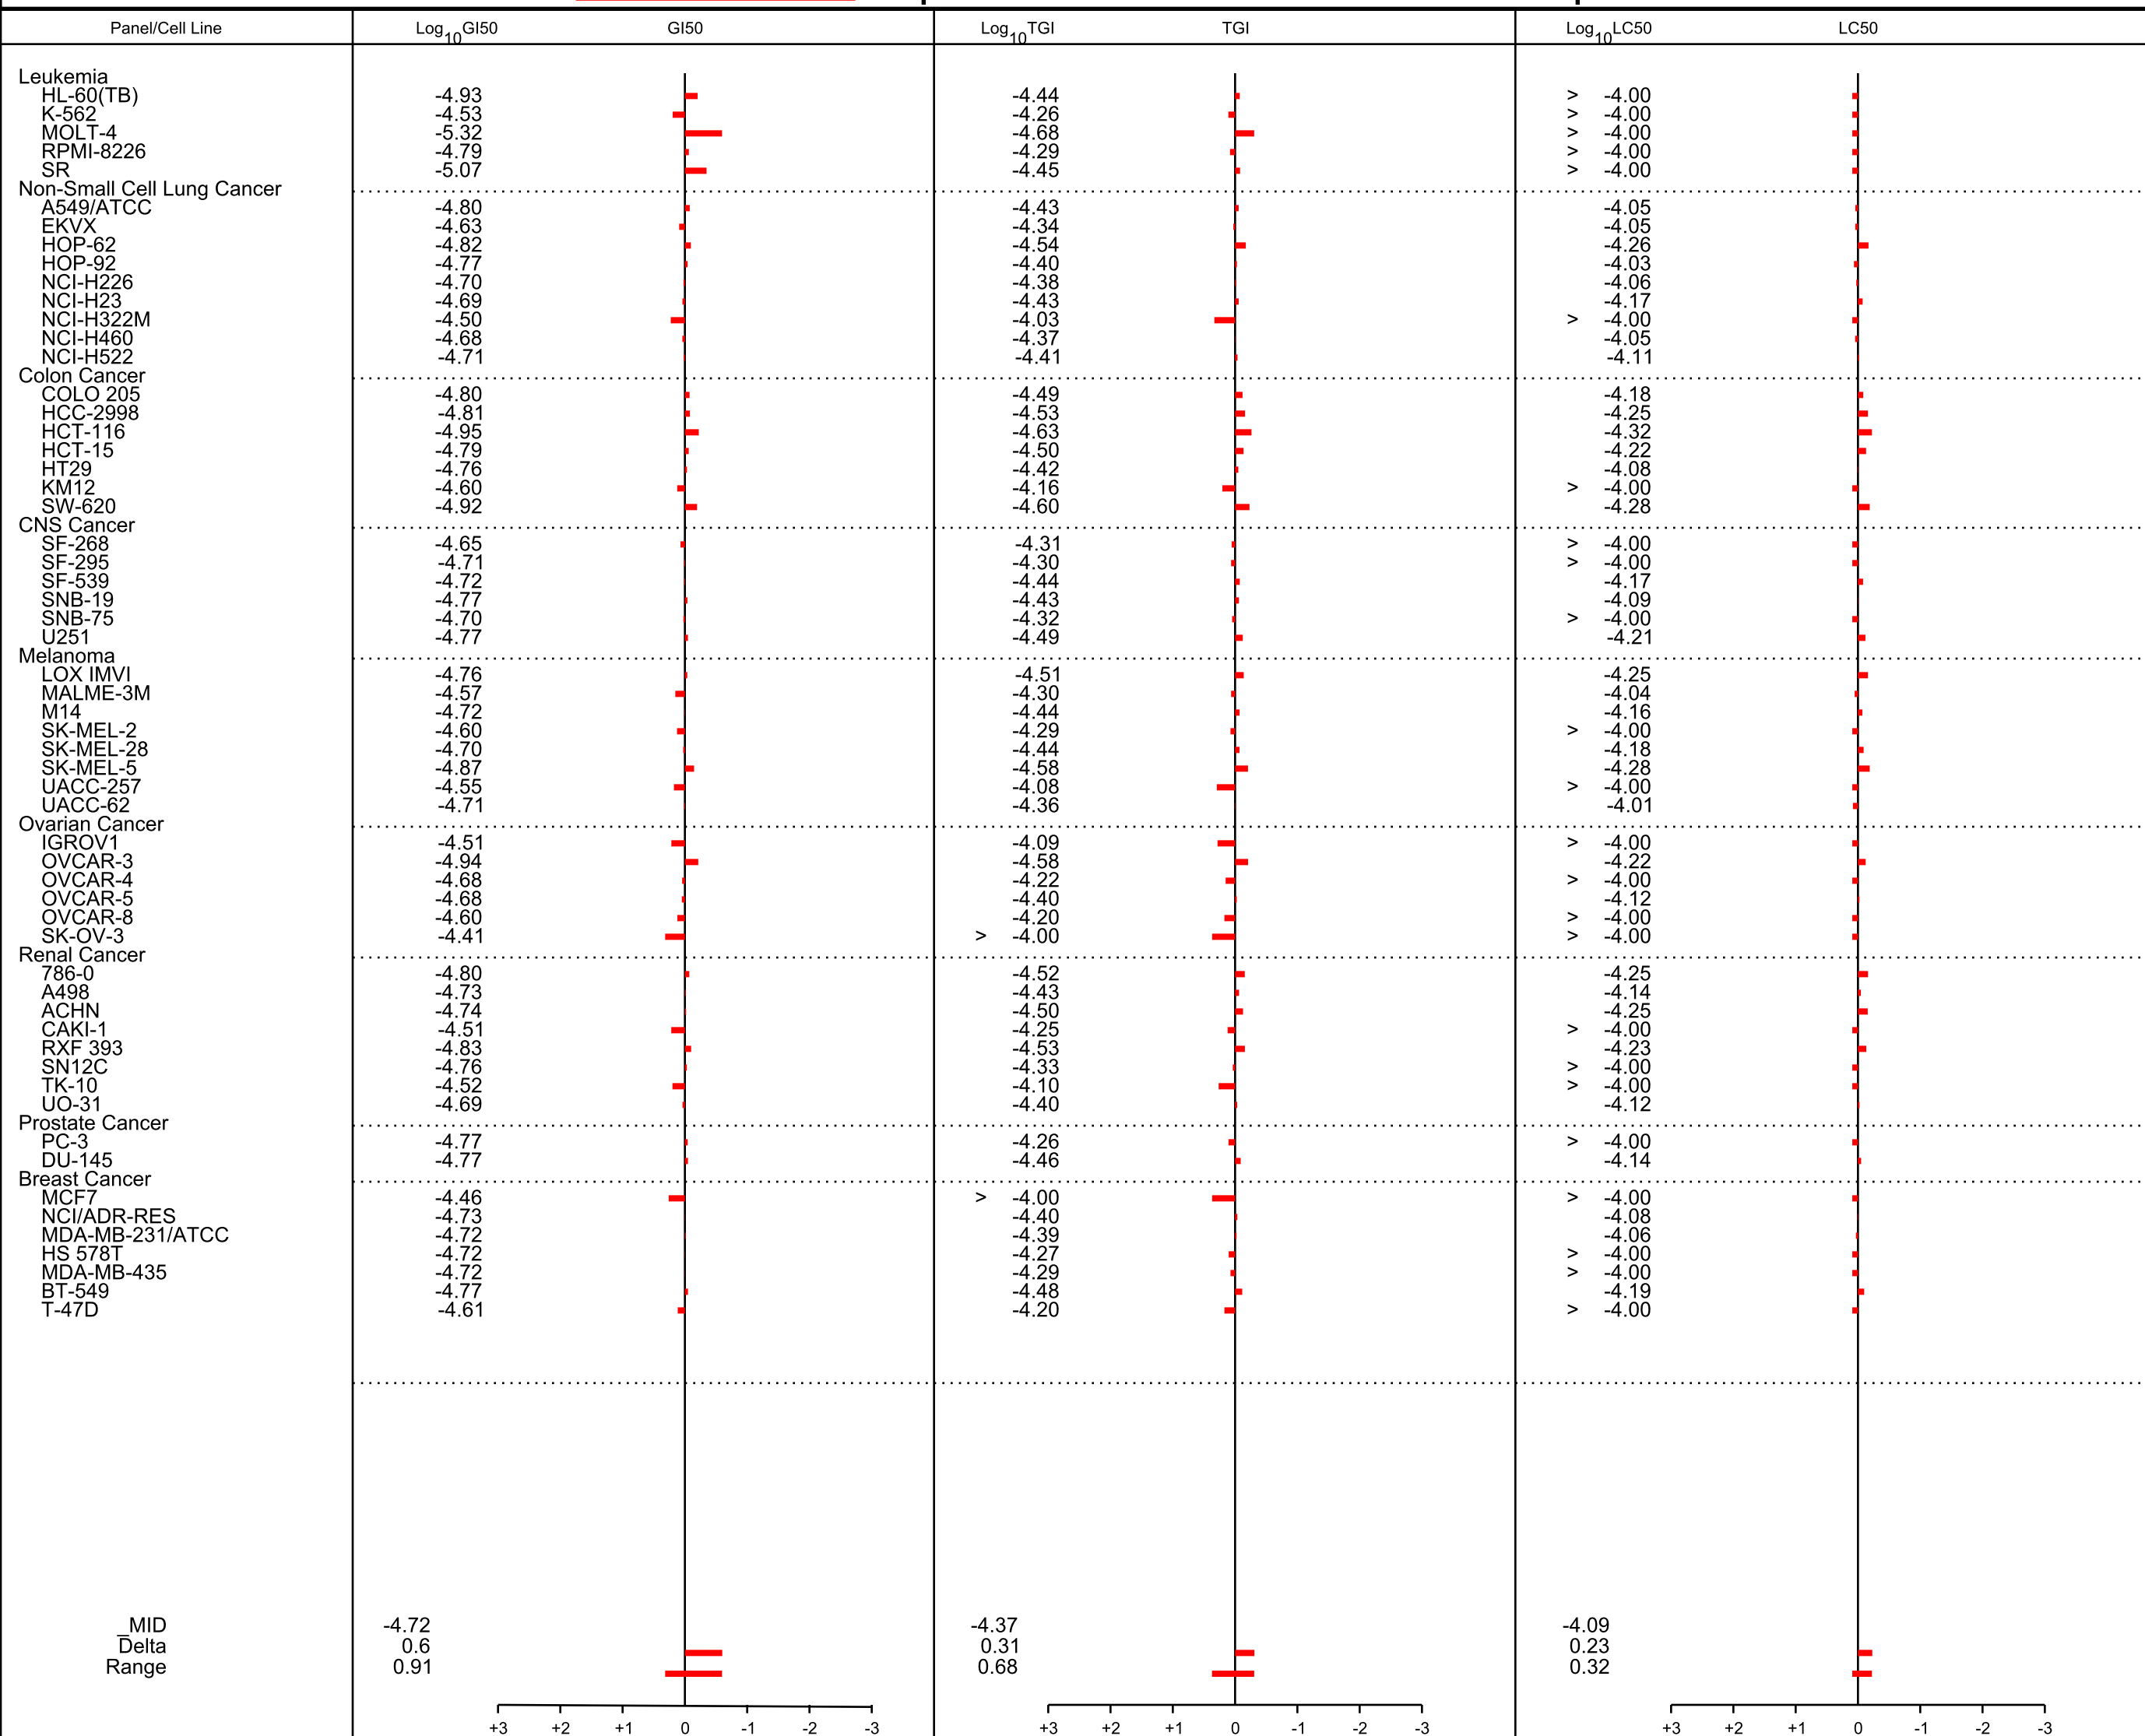

Mean Graphs

**S6. Compound 6**

Report Date : May 12, 2007

Test Date : June 19, 2006

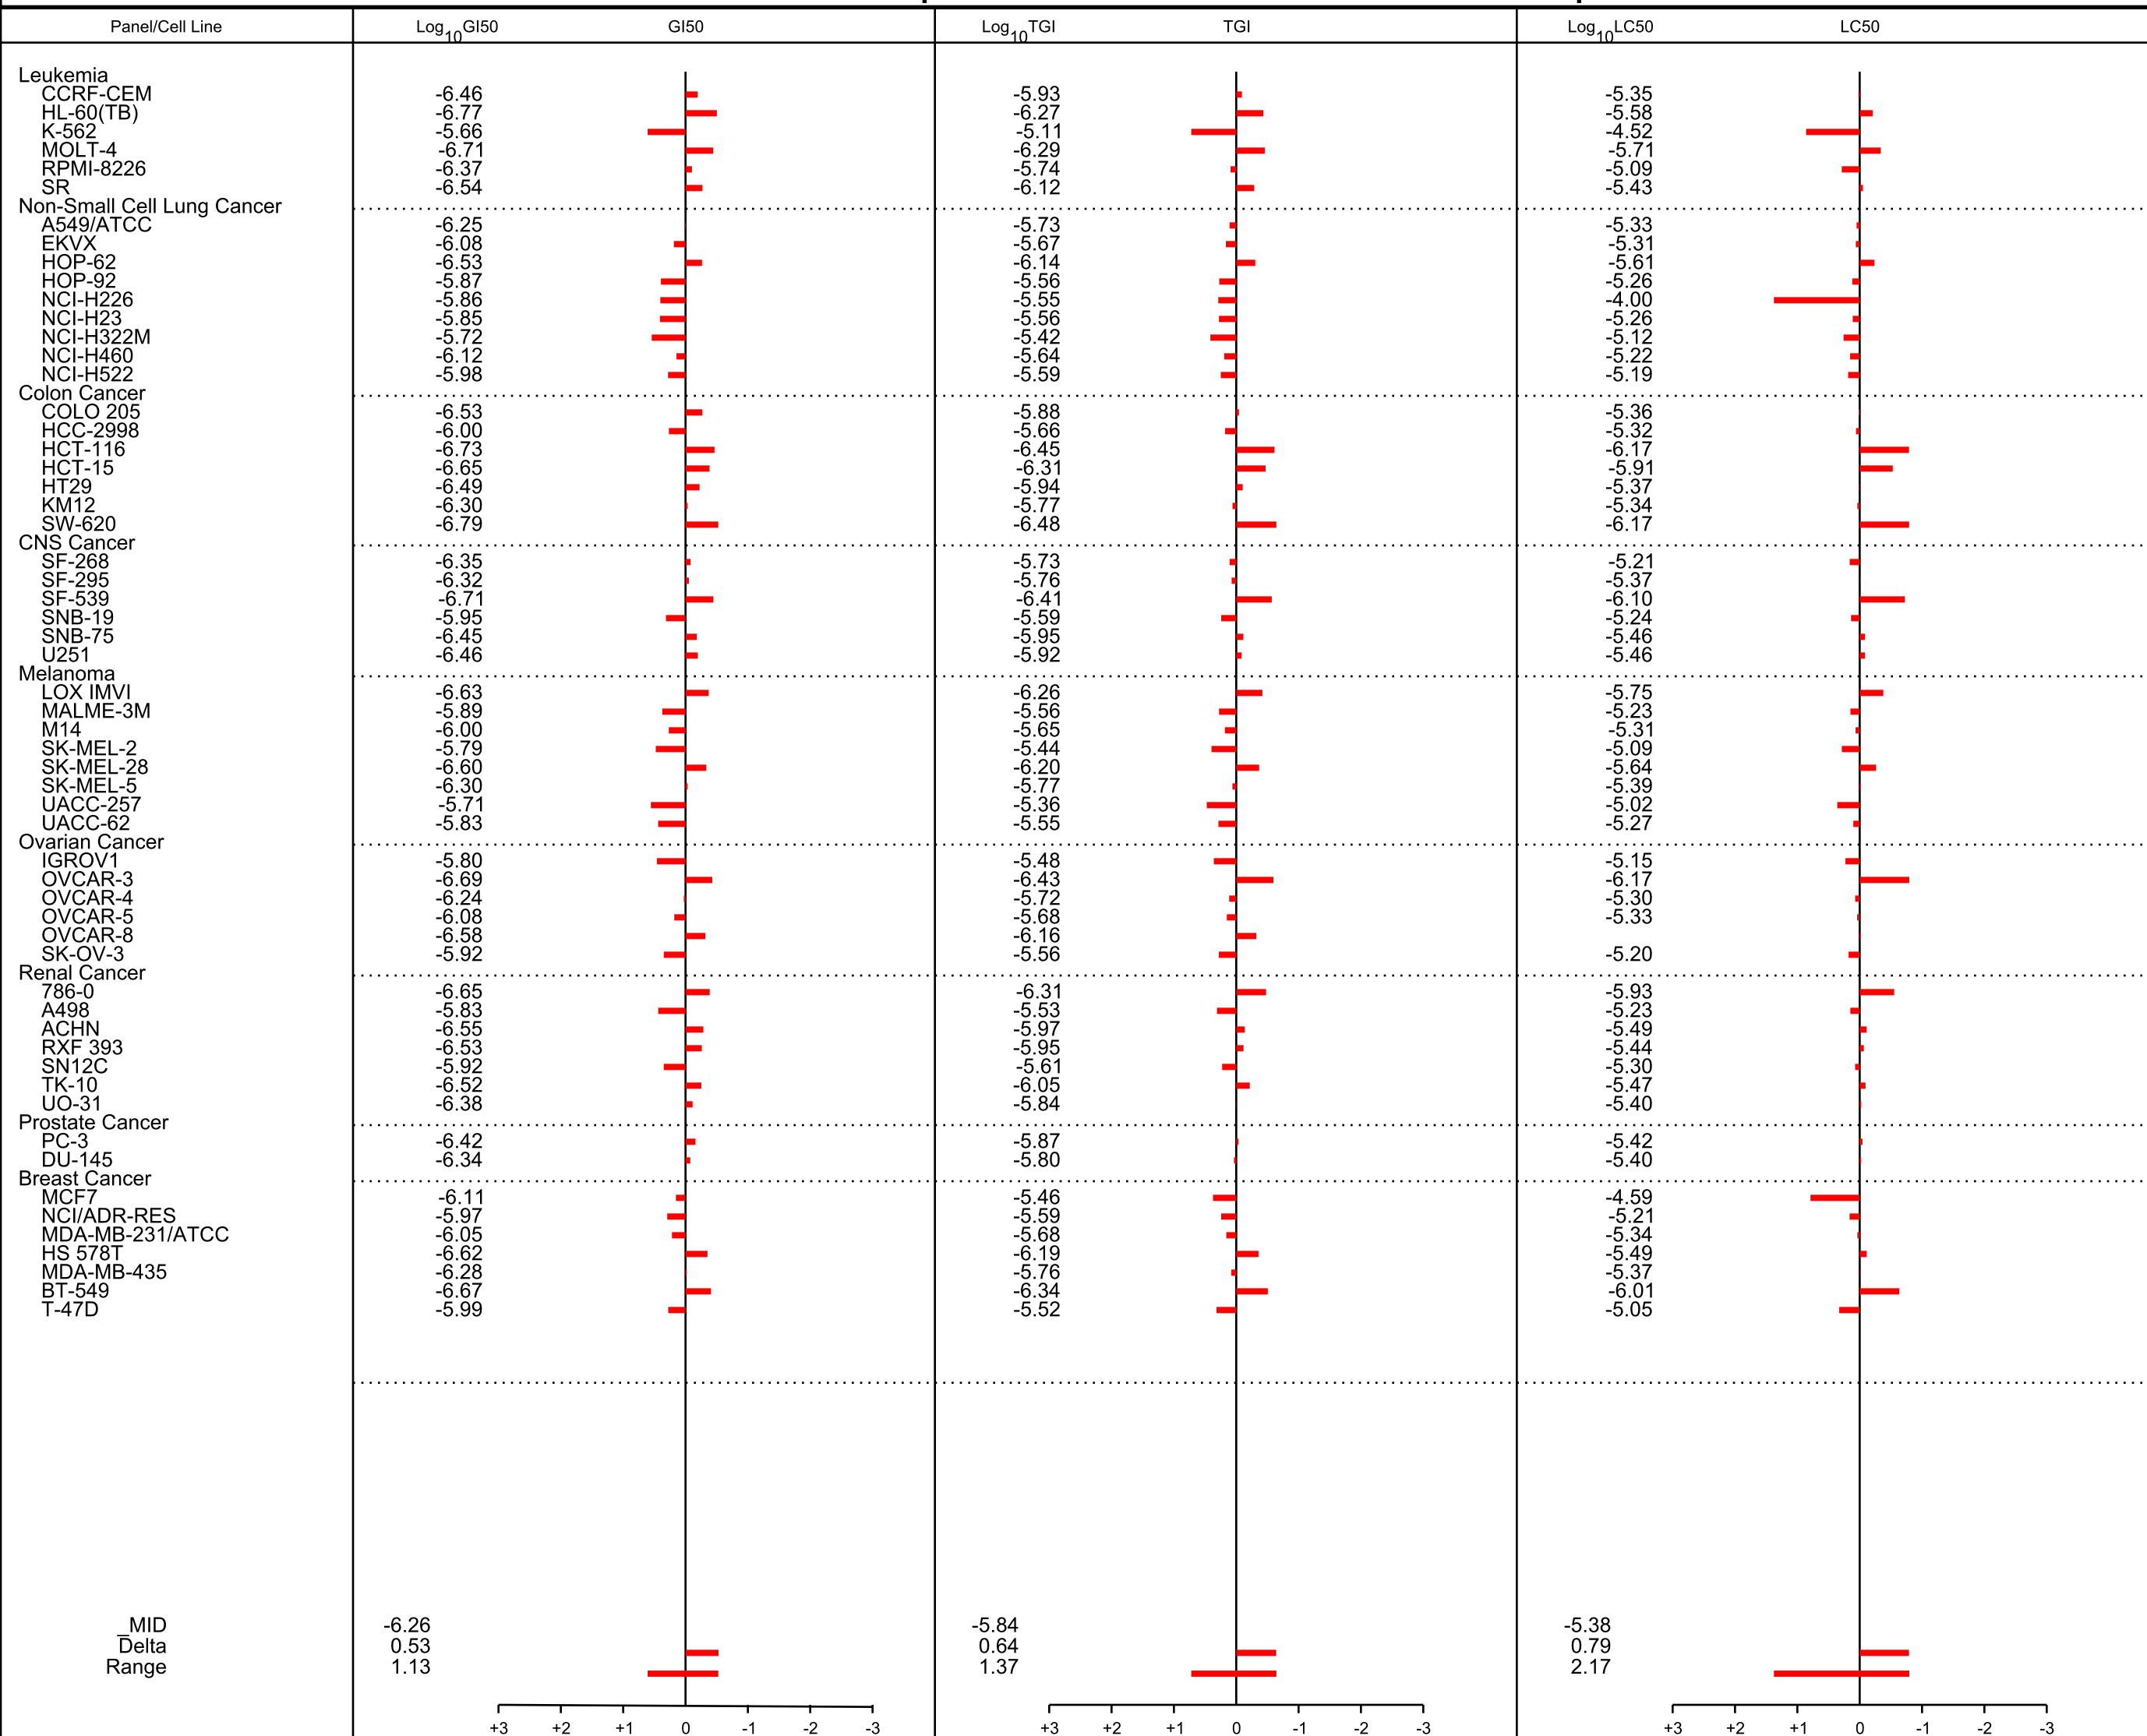

Mean Graphs

**S7. Compound 7**

Report Date : May 12, 2007

Test Date : June 19, 2006

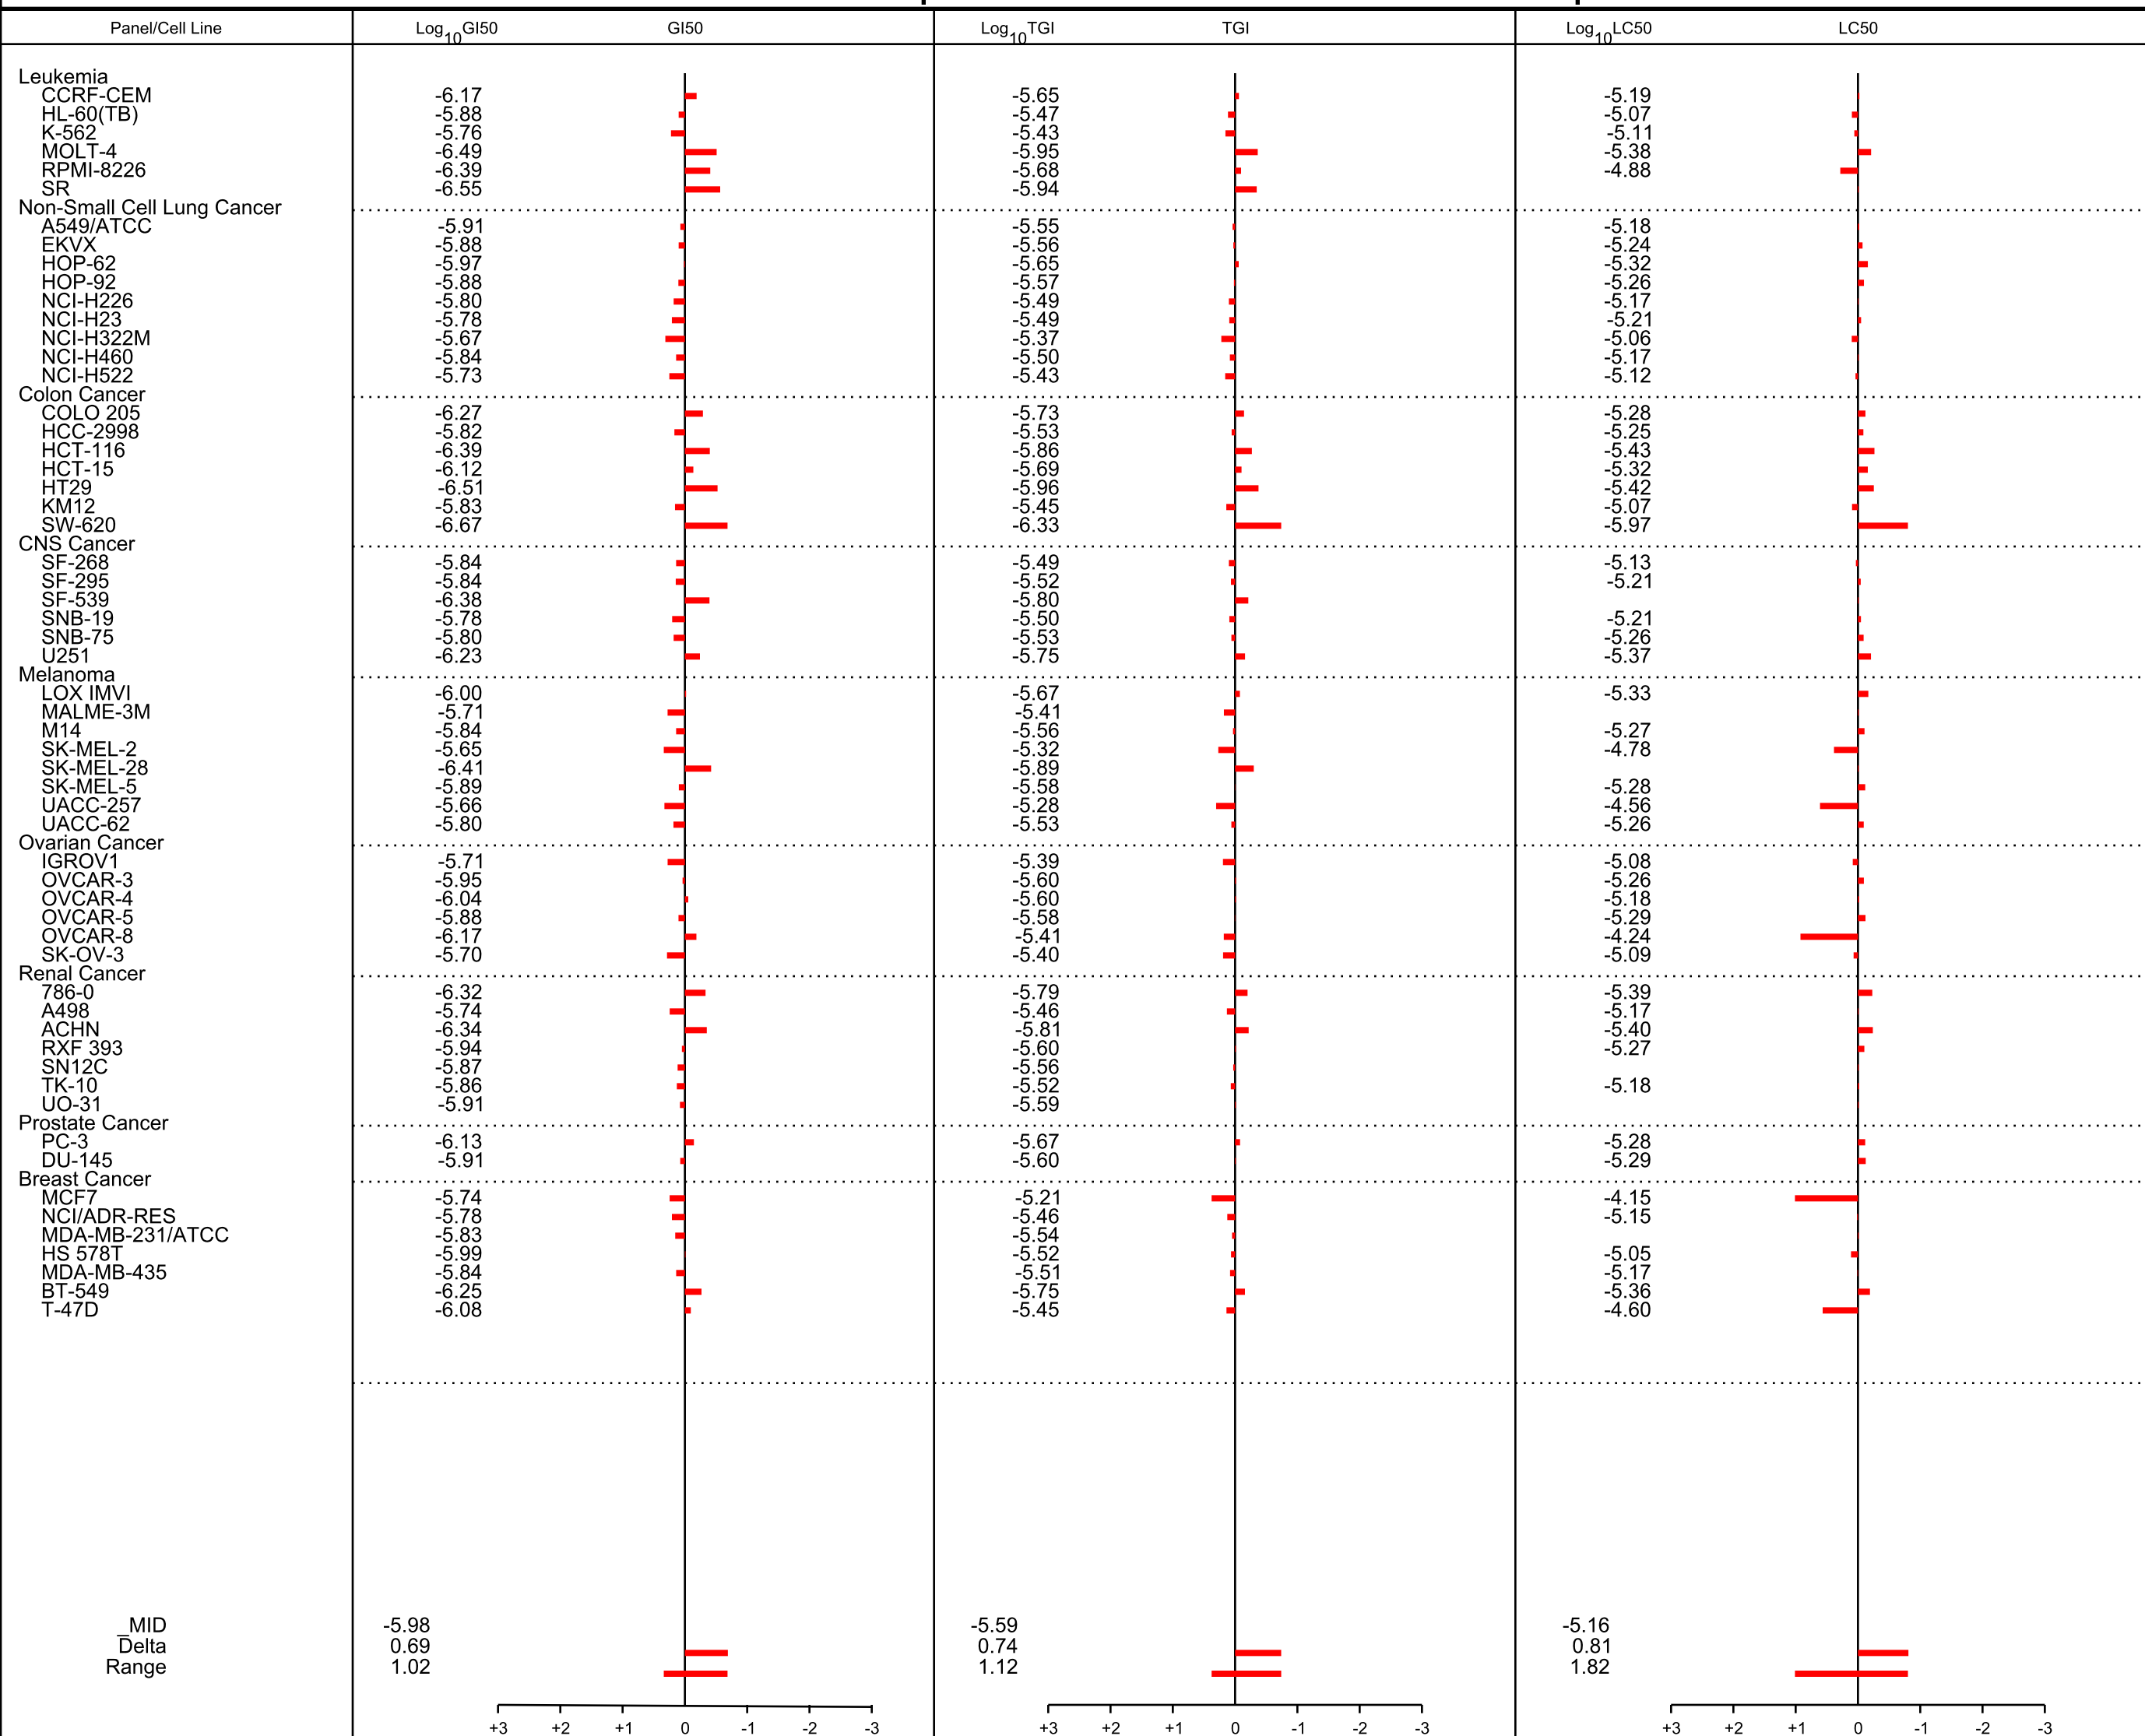

Supplement: NIHMS107360-supplement-001.pdf [file NIHMS107360-supplement-001.pdf]
